# Supplementary material
Source: publisher site journal article supplement (https://www.dovepress.com/article/227329)
Supplement: Supplementary file 1 [file get_supplementary_file.php]

**Appendix**

**Questionnaire on adherence to medical treatment**

This morning, did you take your medicine? 🞎 Yes *0 points*

🞎 No *1 point*

Since your previous visit, did you run out of medicine? 🞎 Yes *0 points*

🞎 No *1 point*

Have you ever taken your treatment late compared to the usual time? 🞎 Yes *0 points*

🞎 No *1 point*

Have you ever not taken your medicine because on certain days you had the impression that your medicine did more harm than good? 🞎 Yes *0 points*

🞎 No *1 point*

Do you think that you have too many different pills to take? 🞎 Yes *0 points*

🞎 No *1 point*

*Score* ≤ 2*: patient defined as adherent; score* ≥ 3*: patient defined as nonadherent.*

**Questionnaire on adherence to recommendations on drinks**

How frequently do you drink alcohol?

🞎 Never

🞎 ≤ once/month

🞎 2 to 4 times/month

🞎 2 to 3 times/week

🞎 ≥ 4 times/week

How many standard glasses of alcohol do you drink during an ordinary day when you do drink?

🞎 1 or 2

🞎 3 or 4

🞎 5 or 6

🞎 7 to 9

🞎 ≥ 10

On a given occasion, how often do you drink six or more standard glasses of alcohol?

🞎 Never

🞎 Less than once a month

🞎 Once a month

🞎 Once a week

🞎 Every day or almost every day

Do you drink soda?

🞎 Never

🞎 Occasionally (less than three times a week)

🞎 Regularly (more than three times a week)

Do you drink beer (with or without alcohol)?

🞎 Never

🞎 Occasionally (less than three times a week)

🞎 Regularly (more than three times a week)
